# Supplementary material for: Effect of freezing on the microstructure of a highly decomposed peat material close to water saturation when used prior to X-ray micro computed tomography
Source: Copernicus journal article supplement (doi:10.5194/soil-2021-86), 2021-08-24

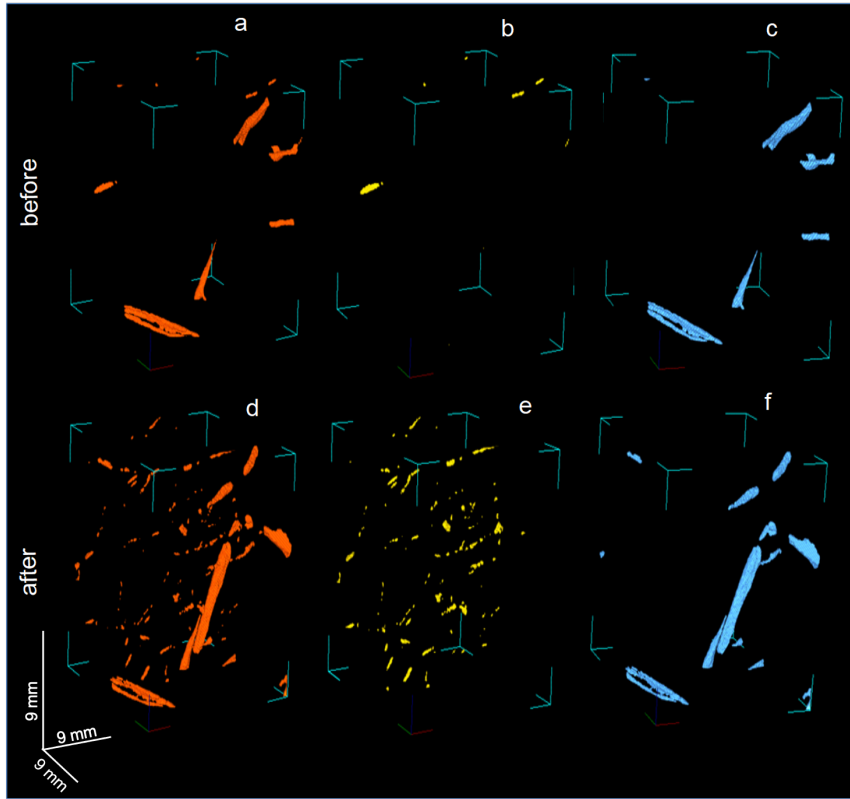

Supplement: Supplementary file [file soil-2021-86-AC7-supplement.pdf]
